# Supplementary material
Source: PubMed Central journal article supplement (PMC4931281)
Supplement: NIHMS796285-supplement-supplement_1.pdf [file NIHMS796285-supplement-supplement_1.pdf]

**Supplemental Table 1 (Web Appendix): Reported cause of death among study participants according to treatment arm**

| <b>Primary Cause of Death</b>          | <b>Empiric<br/>(n=19*)</b> | <b>IPT<br/>(n=22)</b> | <b>All Participants<br/>(n=41)</b> |
|----------------------------------------|----------------------------|-----------------------|------------------------------------|
| HIV infection or HIV-related diagnosis | 17 (89%)                   | 11 (50%)              | 28 (68%)                           |
| TB related death                       | 2                          | 2                     |                                    |
| Non-HIV diagnosis                      | 0 (0%)                     | 5 (23%)               | 5 (12%)                            |
| Toxicity                               | 0 (0%)                     | 1 (5%)                | 1 (2%)                             |
| No information available               | 2 (11%)                    | 4 (18%)               | 6 (15%)                            |
| Other – metabolic acidosis             | 0 (0%)                     | 1 (5%)                | 1 (2%)                             |

Data are n (%). \*One participant in the Empiric arm died at week 11.6 after going off study. The cause of death is not available.

**Supplemental Table 2 (Web Appendix):**

|                                                        | <b>Empiric<br/>(N=32)</b>  | <b>IPT<br/>(N=19)</b>  | <b>All<br/>Participants<br/>(N=51)</b>  |
|--------------------------------------------------------|----------------------------|------------------------|-----------------------------------------|
| <b>Decision, valid diagnosis, AIDS defining event</b>  | <b>31 (97%)</b>            | <b>18 (95%)</b>        | <b>49 (96%)</b>                         |
| Extra pulmonary tuberculosis - clinical diagnosis only | 10                         | 8                      | 18                                      |
| Pulmonary tuberculosis - confirmed                     | 11                         | 4                      | 15                                      |
| Culture Positive                                       | 3 (27%)                    | 4 (100%)               | 7 (47%)                                 |
| Xpert MTB/RIF Positive                                 | 4 (36%)                    | 0 (0%)                 | 4 (27%)                                 |
| AFB positive                                           | 5 (45%)                    | 0 (0%)                 | 5 (33%)                                 |
| Pulmonary tuberculosis - probable                      | 3                          | 3                      | 6                                       |
| Extra pulmonary tuberculosis - probable                | 5                          | 0                      | 5                                       |
| Pulmonary tuberculosis-clinical diagnosis only         | 1                          | 2                      | 3                                       |
| Extra pulmonary tuberculosis - confirmed               | 1                          | 1                      | 2                                       |
| Culture Positive                                       | 0 (0%)                     | 0 (0%)                 | 0 (0%)                                  |
| Xpert MTB/RIF Positive                                 | 0 (0%)                     | 1 (100%)               | 1 (50%)                                 |
| AFB positive                                           | 1 (100%)                   | 0 (0%)                 | 1 (50%)                                 |
| <b>Decision, valid diagnosis, not AIDS defining</b>    | <b>1 (3%)</b>              | <b>0 (0%)</b>          | <b>1 (2%)</b>                           |
| Extra pulmonary tuberculosis - clinical diagnosis only | 1                          | 0                      | 1                                       |
| <b>Chair reviewed, does not meet App 60</b>            | <b>0 (0%)</b>              | <b>1 (5%)</b>          | <b>1 (2%)</b>                           |
| Extra pulmonary tuberculosis - clinical diagnosis only | 0                          | 1                      | 1                                       |
|                                                        | <b>Empiric<br/>(N=425)</b> | <b>IPT<br/>(N=426)</b> | <b>All<br/>Participants<br/>(N=851)</b> |
| <b>Severe bacterial infections</b>                     | <b>37 (9%)</b>             | <b>52 (12%)</b>        | <b>89 (10%)</b>                         |
| Acute gastrointestinal/diarrheal syndrome - confirmed  | 2                          | 0                      | 2                                       |
| Acute gastrointestinal/diarrheal syndrome - probable   | 10                         | 12                     | 22                                      |

|                                                                             |   |   |    |
|-----------------------------------------------------------------------------|---|---|----|
| Acute dysentery - probable                                                  | 0 | 1 | 1  |
| Chronic diarrhea - probable                                                 | 0 | 1 | 1  |
| Persistent diarrhea                                                         | 1 | 3 | 4  |
| Bacterial pneumonia - confirmed                                             | 2 | 3 | 5  |
| Bacterial pneumonia - probable                                              | 6 | 8 | 14 |
| Bacterial pneumonia - clinical diagnosis only                               | 8 | 9 | 17 |
| Bacterial sepsis/catheter related bacteremia/sepsis - confirmed             | 0 | 2 | 2  |
| Bacterial sepsis/catheter related bacteremia/sepsis-clinical diagnosis only | 5 | 8 | 13 |
| Salmonella sepsis (non-typhoid) - confirmed                                 | 1 | 0 | 1  |
| Bacterial sinusitis - probable                                              | 1 | 2 | 3  |
| Bacterial infection-deep tissue/other normally sterile site-confirmed       | 0 | 1 | 1  |
| Bacterial infection-deep tissue/other normally sterile site-probable        | 0 | 1 | 1  |
| Pelvic inflammatory disease - probable                                      | 1 | 1 | 2  |

Data are n (%).
